# Supplementary material for: Design, synthesis and thermotropic self-organization of dendronized polystyrenes with different length alkyl tails
Source: Royal Society of Chemistry journal article supplement (doi:10.1039/c6py01062h), 2016-01-01
Supplement: c6py01062h1.pdf [file c6py01062h1.pdf]

## Electronic Supplementary Information

### **Design, synthesis and thermotropic self-organization of dendronized polystyrenes with different length alkyl tails**

Ming Yang, Dongxiong Mao, Sheng Chen\* and Hailiang Zhang\*

*Key Laboratory of Polymeric Materials and Application Technology of Hunan  
Province, Key Laboratory of Advanced Functional Polymer Materials of Colleges  
and Universities of Hunan Province, College of Chemistry, Xiangtan University,  
Xiangtan 411105, Hunan Province, China*

#### **Contents of supporting information:**

Fig. S1. <sup>1</sup>H NMR spectrums of monomers MTAVB-m.

Fig. S2. <sup>1</sup>H NMR spectrums of corresponding polymers PTAVB-m.

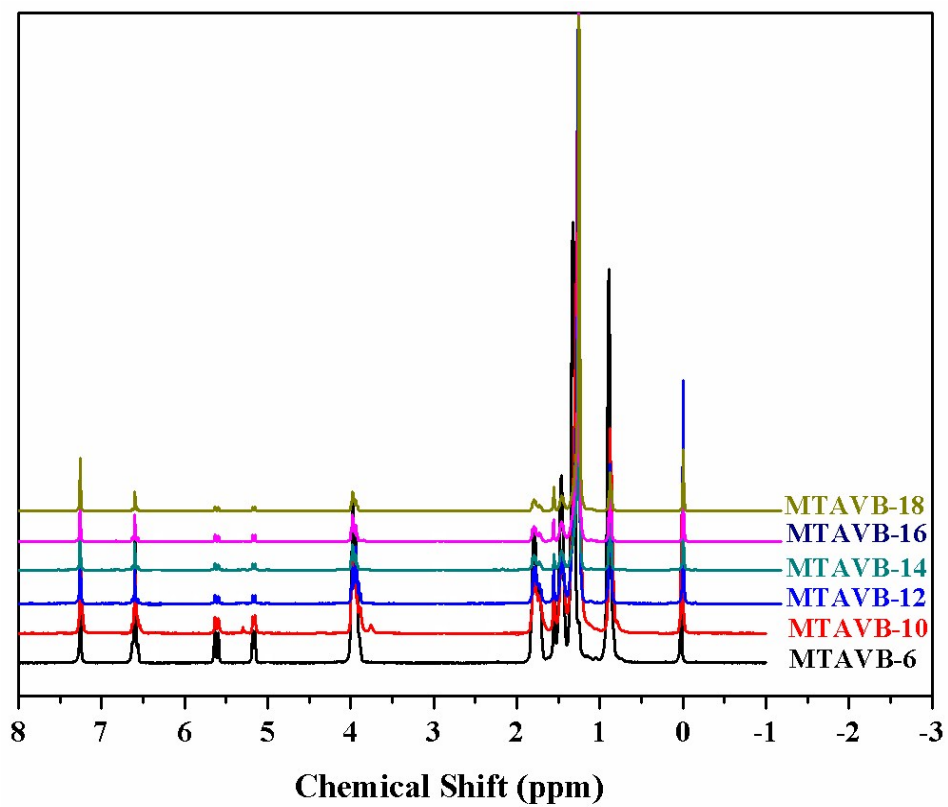

Fig. S1 <sup>1</sup>H NMR spectrums of monomer MTAVB-m.

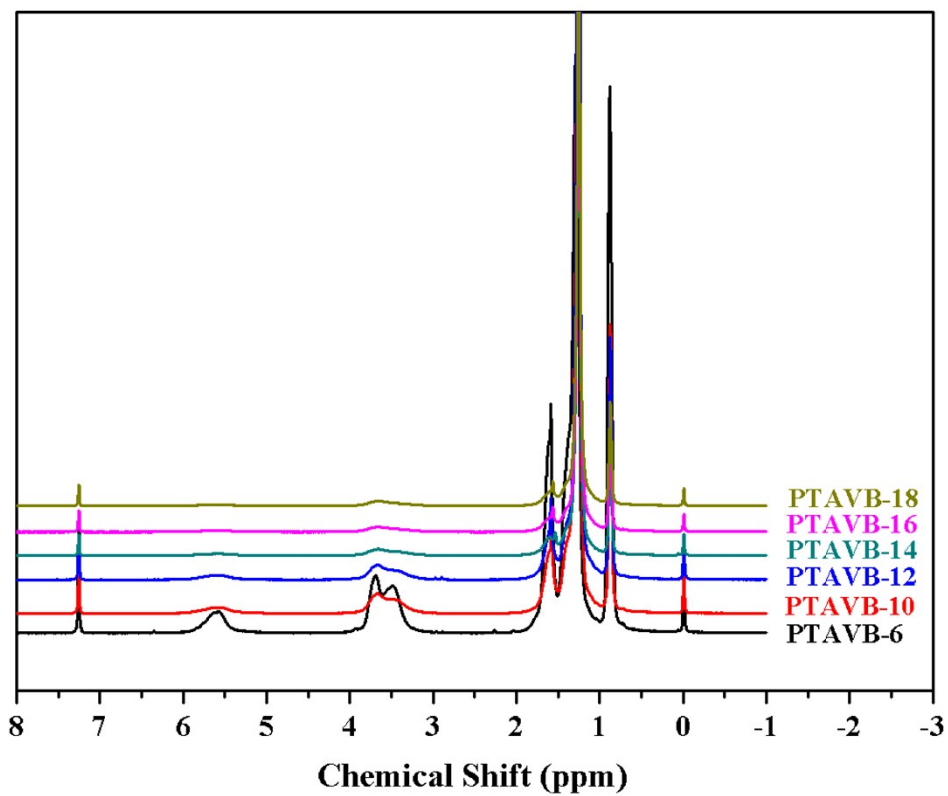

Fig. S2 <sup>1</sup>H NMR spectrums of corresponding polymers PTAVB-m.
